# Supplementary material for: Increased Hematopoietic Extracellular RNAs and Vesicles in the Lung during Allergic Airway Responses
Source: PubMed Central journal article supplement — Cell Rep. Author manuscript; Available in PMC 2019 Feb 6. (PMC6365014; doi:10.1016/j.celrep.2019.01.002), 2019-01-22
Supplement: NIHMS1519372-supplement-1.pdf [file NIHMS1519372-supplement-1.pdf]

**Cell Reports, Volume 26**

**Supplemental Information**

**Increased Hematopoietic Extracellular  
RNAs and Vesicles in the Lung  
during Allergic Airway Responses**

**Heather H. Pua, Hannah C. Happ, Carleigh J. Gray, Darryl J. Mar, Ni-Ting Chiou, Laura E. Hesse, and K. Mark Ansel**

0.5 fmol of calibrator cocktail was spiked into each library prep

$$\frac{\text{fmol miRNA sequenced}}{\text{ug total RNA}} = \frac{\text{raw miRNA reads} * \frac{0.5 \text{ fmol}}{\text{raw calibrator reads}}}{\text{ug total RNA input}}$$

**Figure S1. Calibrator calculation of sequenced miRNA** (related to Figure 1). Formula using spiked-in calibrators to calculate fmol of miRNAs per input of total RNA.

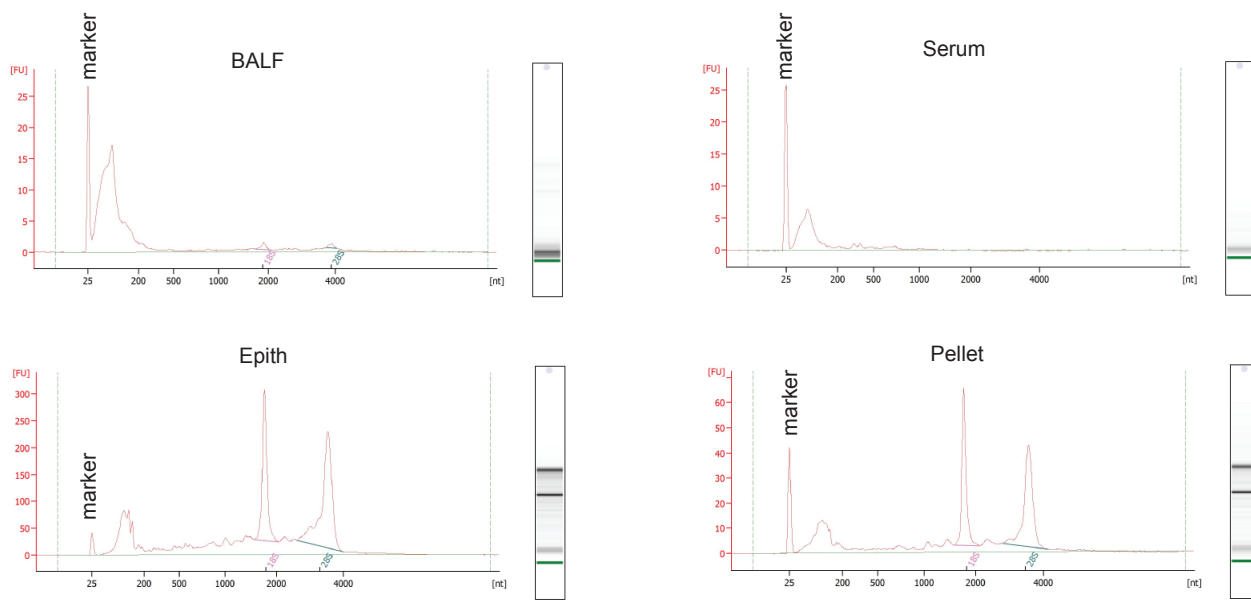

**Figure S2. Biofluids contain predominantly small RNA species** (related to Figure 1). Example Bioanalyzer tracings for BALF, epithelial brushings, hematopoietic rich cell pellets from bronchial washings, and serum used for generating sequencing libraries.

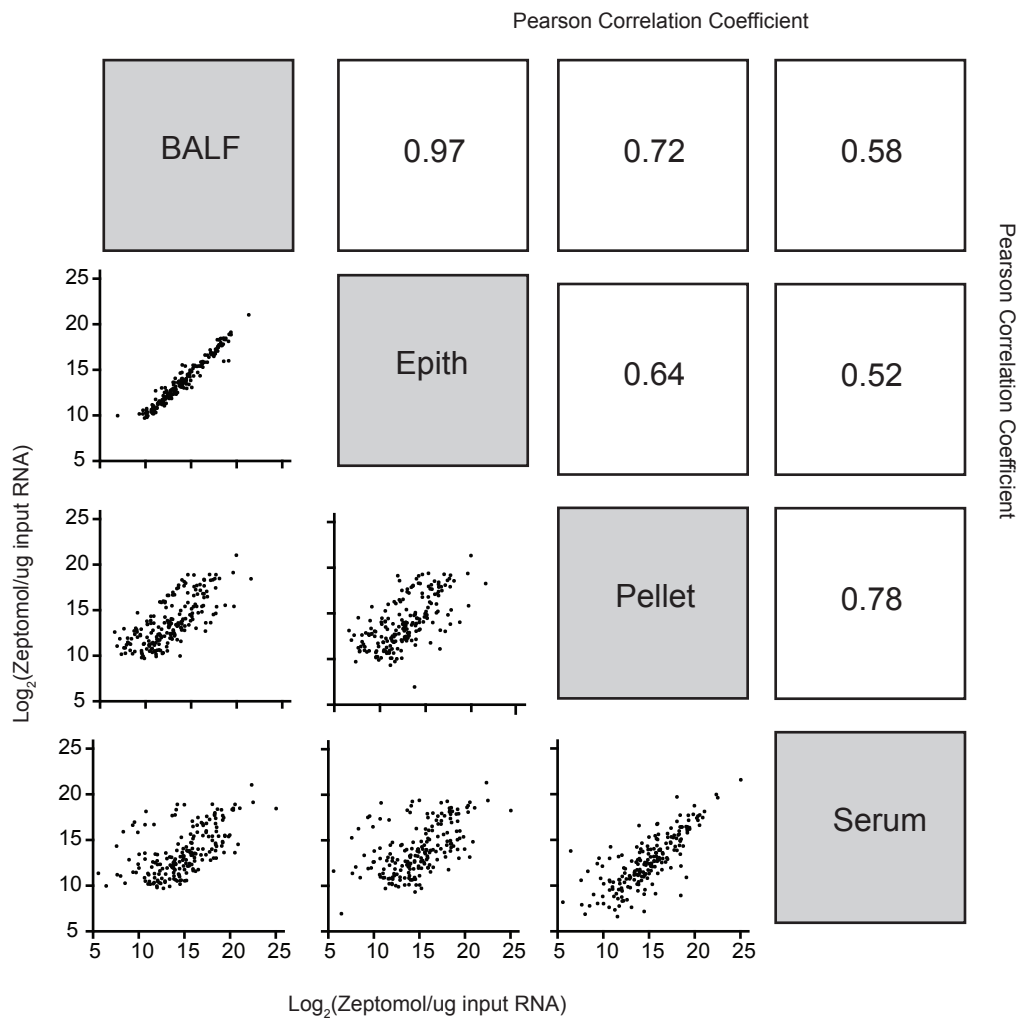

**Figure S3. Correlation of ex-miRNA and miRNA expression by sample type** (related to Figure 1). Pearson correlation coefficient matrix of top 200 expressed ex-miRNAs in BALF and serum and cellular miRNA in epithelial brushings and hematopoietic cell rich cell pellets from bronchial washes. The log<sub>2</sub> value of calibrator normalized miRNA per input of total miRNAs is depicted.

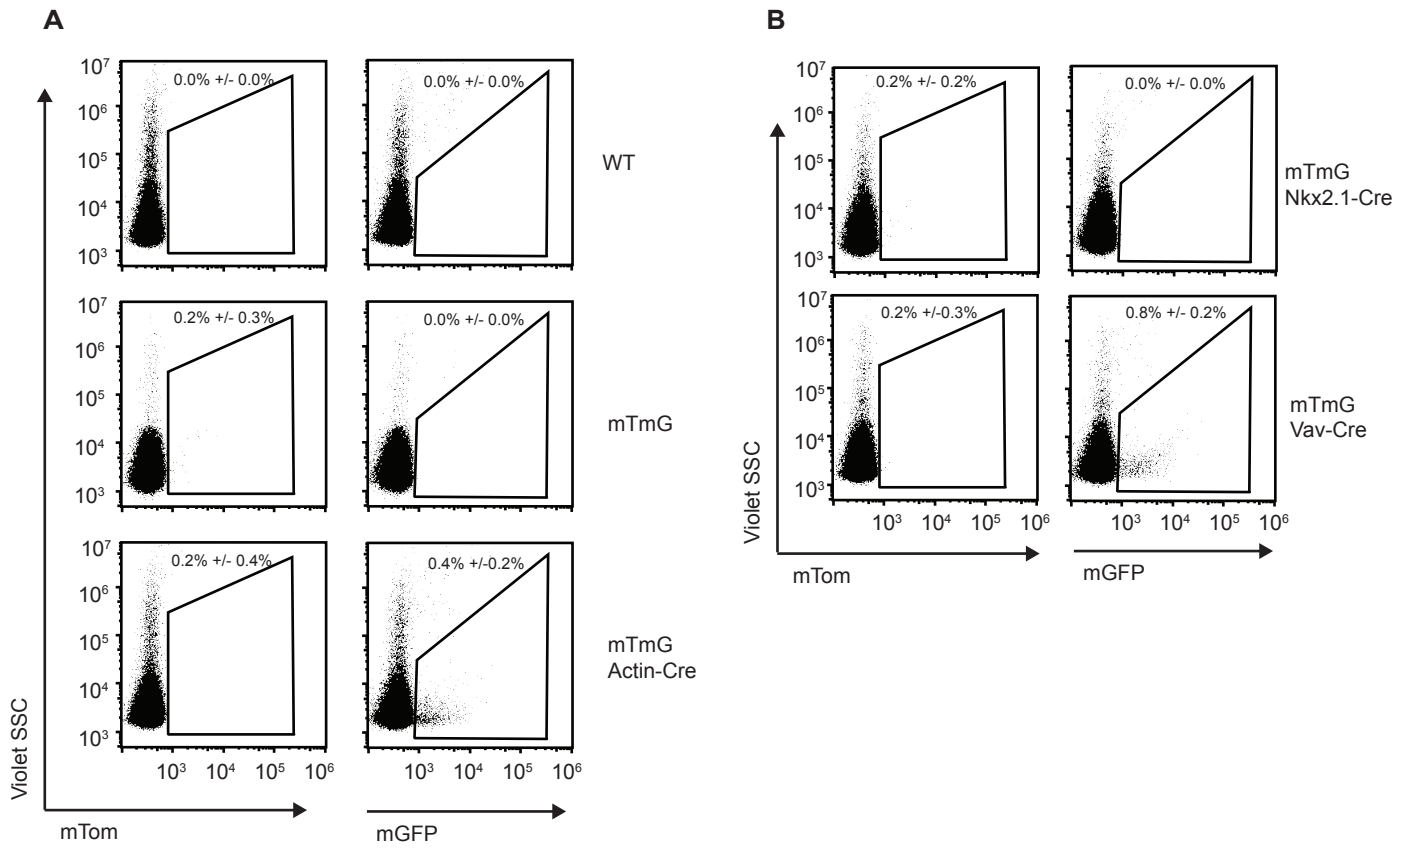

**Figure S4. EV flow in serum** (related to Figures 5 and 6). EV Flow of serum from (A) wild type control (WT), mTmG, and mTmG Actin-Cre and (B) mTmG Nkx2.1-Cre and mTmG Vav-Cre mice for detection of vesicles positive for membrane-bound Tomato (mTom) and membrane-bound Green Fluorescent Protein (mGFP).

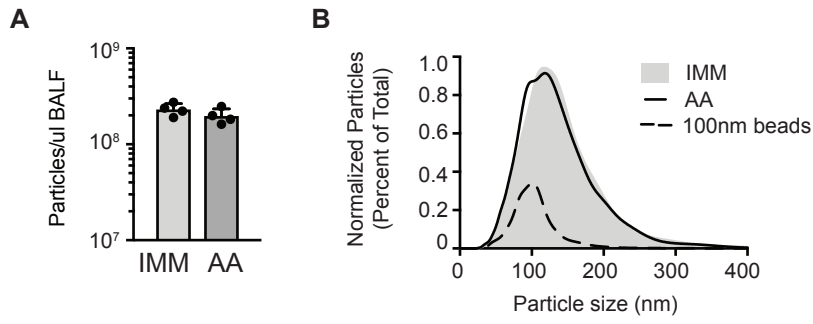

**Figure S5. Nanoparticle tracking of immunized versus allergic airway BALF** (related to Figure 6). (A) Concentration of particles in IMM and AA BALF by nanoparticle tracking assays. Each data point represents the average of three technical replicate readings for a single mouse (n=4, two-tailed t-test). (B) Size distribution of particles in BALF and serum in same mice as (A). 100nm beads are included as a positive control.

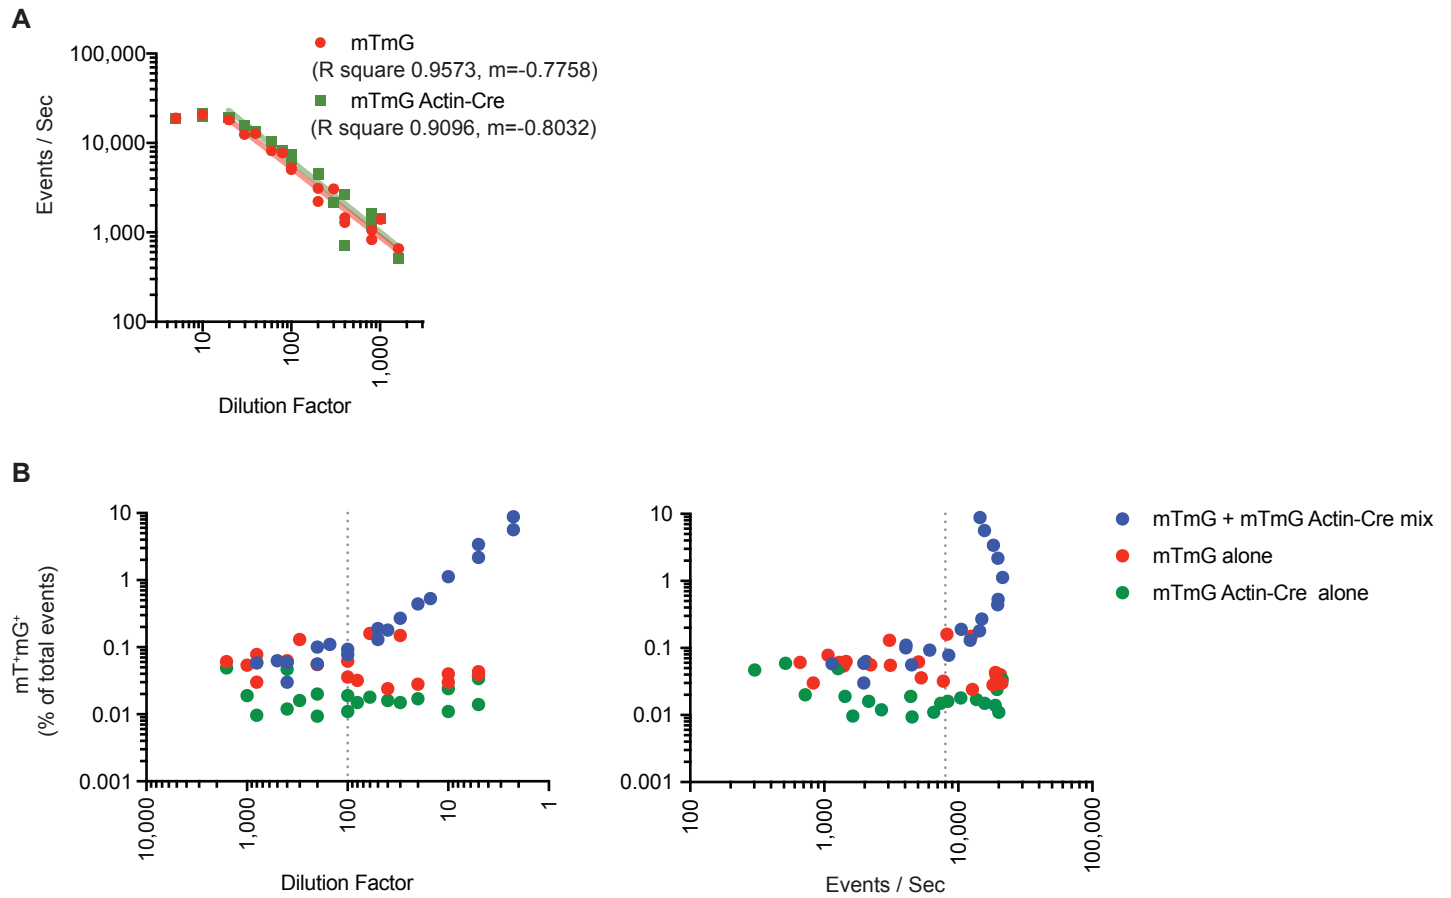

**Figure S6. Measurement of flow rate and swarm effects in EV flow** (related to Figure 5). (A) mTmG and mTmG Actin-Cre BALF samples were diluted 1:5 to 1:1600 in PBS and total events per second were determined. Linear regressions were calculated with exclusion of the two most concentrated specimens. (B) mTmG and mTmG Actin-Cre BALF samples were either run separately or mixed in equal ratio at different dilutions and the percent of detected Tomato positive (mT+) and GFP positive (mG+) particles used to measure coincident detection. Dotted lines at 1:100 dilution factor and 8,000 events/sec were used as cutoffs for collecting data in experiments in this study. Data plotted in both (A) and (B) is from four mice from two independent experiments.

| REAGENT or RESOURCE                                                                                                                                                                                                   | SOURCE                                               | IDENTIFIER |
|-----------------------------------------------------------------------------------------------------------------------------------------------------------------------------------------------------------------------|------------------------------------------------------|------------|
| <b>Oligonucleotides</b>                                                                                                                                                                                               |                                                      |            |
| calibrator 1 pGUCCCACUCCGUAGAUCUGUUC                                                                                                                                                                                  | Williams et al., 2013                                | N/A        |
| calibrator 2 pGAUGUAACGAGUUGGAAUGCAA                                                                                                                                                                                  | Williams et al., 2013                                | N/A        |
| calibrator 3 pUAGCAUAUCGAGCCUGAGAACA                                                                                                                                                                                  | Williams et al., 2013                                | N/A        |
| calibrator 4 pCAUCGGUCGAACUUAUGUGAAA                                                                                                                                                                                  | Williams et al., 2013                                | N/A        |
| calibrator 7 pAGGUUCCGGUAAGUAAGAGCC                                                                                                                                                                                   | Williams et al., 2013                                | N/A        |
| Primer: miR-21a-5p: UAGCUUAUCAGACUGAUGUUGA                                                                                                                                                                            | <a href="http://www.mirbase.org">www.mirbase.org</a> | N/A        |
| Primer: miR-24-3p: UGGCUCAGUUCAGCAGGAACAG                                                                                                                                                                             | <a href="http://www.mirbase.org">www.mirbase.org</a> | N/A        |
| Primer: miR-34c-5p:<br>AGGCAGUGUAGUUAGCUGAUUGC                                                                                                                                                                        | <a href="http://www.mirbase.org">www.mirbase.org</a> | N/A        |
| Primer: miR-142a-3p:<br>UGUAGUGUUUCCUACUUUAUGGA                                                                                                                                                                       | <a href="http://www.mirbase.org">www.mirbase.org</a> | N/A        |
| Primer: miR-200b-3p:<br>UAAUACUGCCUGGUAUAUGAUGA                                                                                                                                                                       | <a href="http://www.mirbase.org">www.mirbase.org</a> | N/A        |
| Primer: miR-223-3p: UGUCAGUUUGUCAAAUACCCCA                                                                                                                                                                            | <a href="http://www.mirbase.org">www.mirbase.org</a> | N/A        |
| Primer: 5.8S ribosomal RNA Forward:<br>ATCGTAGGCACCGCTACGCCTGTCTG                                                                                                                                                     | Bronevetsky et al., 2013                             | N/A        |
| Primer: U7 small nuclear RNA Forward:<br>GTTACAGCTCTTTTAGAATTTGTCTAGC                                                                                                                                                 | Bronevetsky et al., 2013                             | N/A        |
| Small RNA sequencing: 3' oligodeoxynucleotide adapter:<br>5Phos/NNNNNXXXXTGGAAATTCTCGGGTGCCAAGG /3AmMO (where "N" are random nucleotides and "X" are pentamer indexing barcodes as outlined in the original protocol) | This paper and Williams et al., 2013                 | N/A        |
| Small RNA sequencing: 5' oligoribonucleotide adapter:<br>rGrUrUrCrArGrArGrUrUrCrUrArCrArGrUrCrCrGrArCrGrArUrCrNrNrNrNrN (where "rN" are random nucleotides)                                                           | This paper and Williams et al., 2013                 | N/A        |
| Small RNA sequencing: Library amplification 3' PCR primer:CAAGCAGAAGACGGCATAACGAGATCGTGATG TGACTGGAGTTCCTTGGCACCCGAGAATTCCA                                                                                           | This paper and Williams et al., 2013                 | N/A        |
| Small RNA sequencing: RT of library:<br>GCCTTGGCACCCGAGAATTCCA                                                                                                                                                        | This paper and Williams et al., 2013                 | N/A        |

**Table S5: Oligonucleotides** (related to Key Resources Table in STAR METHODS).
